# Supplementary material
Source: publisher site journal article supplement (https://www.spandidos-publications.com/4794/downloadSupplementary)

Figure S1. mRNA expression levels of SIRT in MRC5 cells. Relative mRNA expression levels of (A) SIRT1, (B) SIRT2, (C) SIRT6 and (D) SIRT7 normalized to GAPDH mRNA expression assessed using reverse transcription-quantitative PCR in cells cultured for 2, 4, 6 and 8 weeks. SIRT; sirtuin. \*\*\*\*P<0.0001.

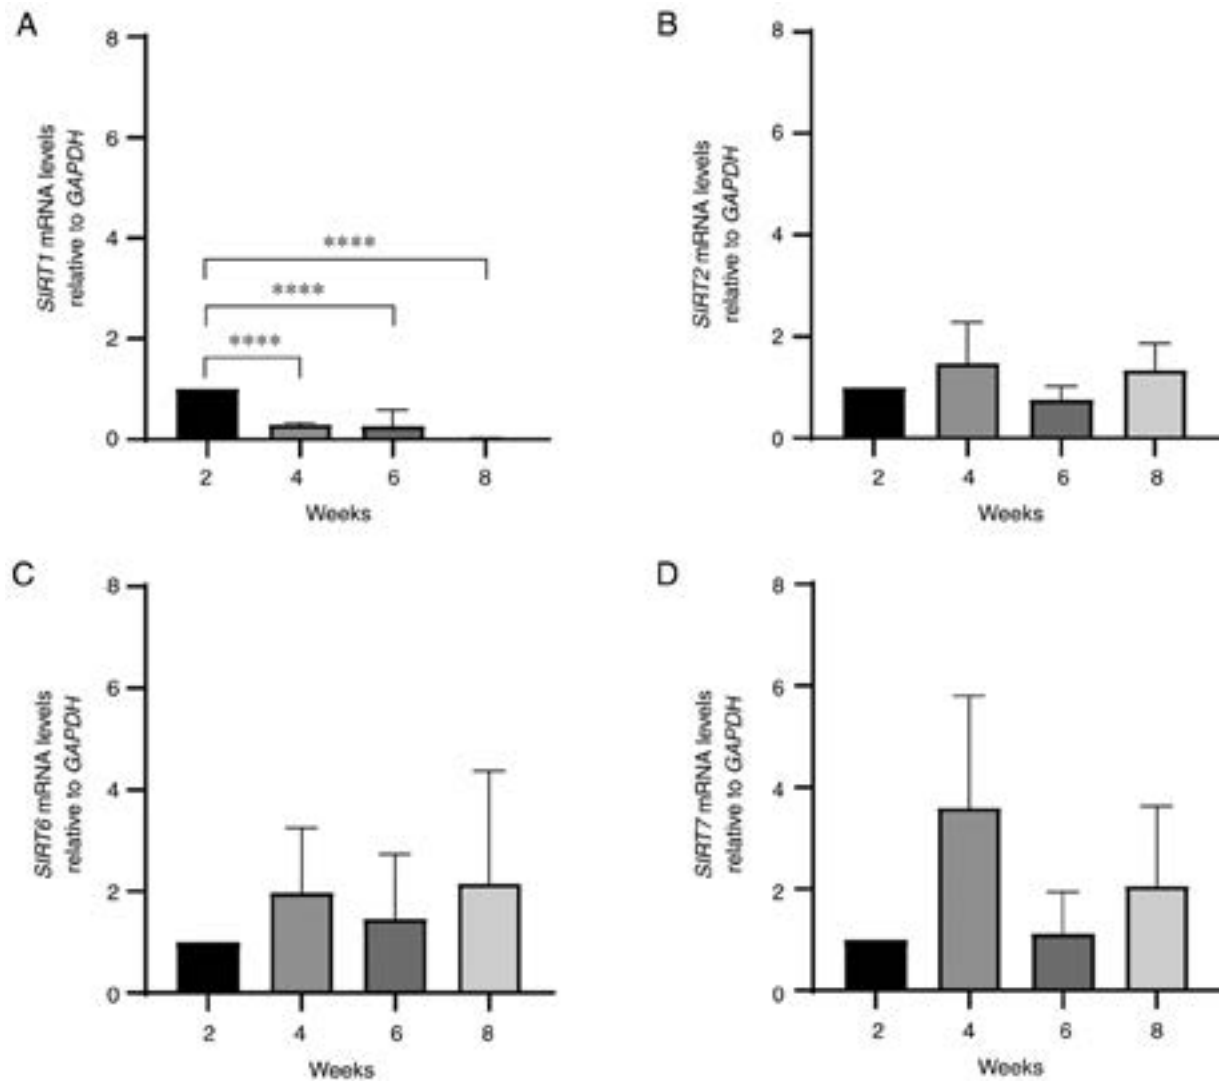

Figure S2. Protein expression levels of SIRT7 assessed using western blotting in MRC5 cells cultured to different time points (2, 4, 6 and 8 weeks). TFIIB protein levels were used as a loading control. SIRT; sirtuin; TFIIB, transcription factor IIB).

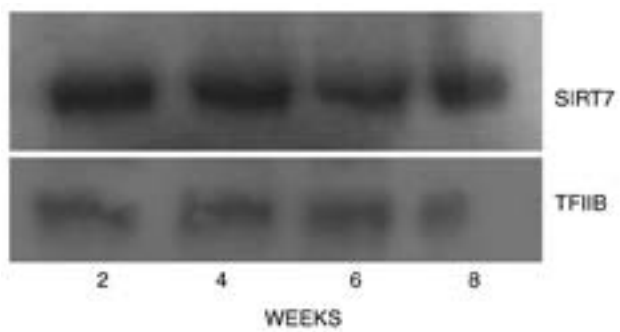

Supplement: Supplementary file 1 [file downloadSupplementary]
